# Supplementary material
Source: Springer Nature journal article supplement (https://www.springermedizin.de/resource/supplementary/12990_2009_234_MOESM8_ESM.pdf/9612850)

**A**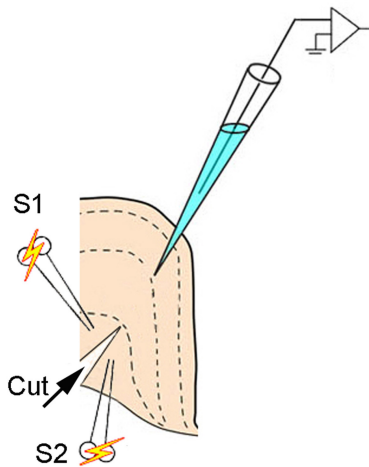**B**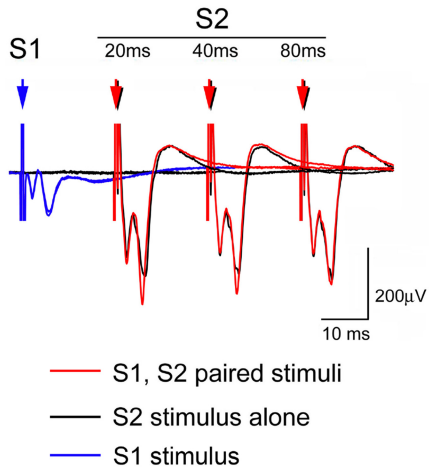**C**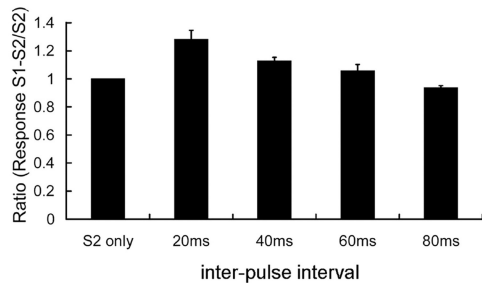

Supplement: MOESM8 [file 9612850]
